# Supplementary material for: Micellization and thermodynamics study of ester functionalized picoline-based ionic liquid surfactants in water
Source: Royal Society of Chemistry journal article supplement (doi:10.1039/d2ra01706g), 2022-01-01
Supplement: d2ra01706g1.pdf [file d2ra01706g1.pdf]

## Electronic Supplementary Information

### Micellization and thermodynamics study of ester functionalized picoline-based ionic liquids surfactants in water

Dong Fu<sup>a,b,#</sup>, Xiaoru Gao<sup>c,#</sup>, Jue Wang<sup>a</sup>, Haijian Jiang<sup>a</sup>, Mingming Zheng<sup>a</sup>, Peng Li<sup>a</sup>, Bo Huang<sup>a</sup>, Kan Kan<sup>a\*</sup> and Xiaochen Zhang<sup>a\*</sup>

<sup>a</sup> Heilongjiang Academy of Sciences, Institute of Advanced Technology, Harbin, P.R., China;

<sup>b</sup> College of Materials Science and Chemical Engineering, Harbin Engineering University, Harbin, P.R., China;

<sup>c</sup> Harbin Fiber Reinforced Plastic Institute, Harbin, P.R. China.

\* Corresponding author: Kan Kan and Xiaochen Zhang

E-mail address: kankan.has@foxmail.com.

E-mail address: 13946165731@163.com.

# Dong Fu and Xiaoru Gao contributed equally to this work.

## Synthesis of ionic liquids (ILs)

### General preparation of fatty acid 2-bromoethyl ester

Briefly, dodecanoic acid was mixed with 1 equivalent of 2-bromoethanol in a 100 mL three-necked flask while a trace amount  $\text{H}_2\text{SO}_4$  as a catalyst was added, the system was reacted for 3 h at 60 °C. After the reaction, the crude product was washed by 30 mL $\times$ 3  $\text{H}_2\text{O}$  and extracted by 50 mL $\times$ 3  $\text{CHCl}_3$ , then the organic phase was dry by  $\text{Na}_2\text{SO}_4$ .  $\text{CHCl}_3$  was removed under a high vacuum. The pure dodecanoic acid 2-bromoethyl ester ( $\text{C}_{12}\text{BrEE}$ ) was recrystallized in fresh methanol at least three times. The syntheses process of myristic acid 2-bromoethyl ester ( $\text{C}_{14}\text{BrEE}$ ) and decanoic acid 2-bromoethyl ester ( $\text{C}_{10}\text{BrEE}$ ) were identical. The myristic acid and decanoic acid were used to synthesize, respectively.

### General procedure for the synthesis of $[\text{C}_n\text{Empy}][\text{Br}]$

3-methylpyridinium was mixed with 1 equivalent of dodecyl 2-bromoethyl ester in 30 mL dry toluene in a 100 mL two-necked flask and refluxed for 6 h under nitrogen atmosphere. After the reaction, toluene was removed under a high vacuum and the pure  $[\text{C}_{12}\text{Empy}][\text{Br}]$  was recrystallized in fresh ethyl acetate at least three times.

**$\text{C}_{10}\text{BrEE}$ :** yellow liquid. Yield: 93%.  $^1\text{H}$  NMR ( $\text{CDCl}_3$ , 400 MHz),  $\delta$ : 4.421~4.285 (t, 2H), 3.539~3.509 (t, 2H), 2.378~2.316 (t, 2H), 1.668~1.633 (m, 2H), 1.280 (m, 14H), 0.891~0.868 (t, 3H);  $^{13}\text{C}$  NMR ( $\text{CDCl}_3$ , 100 MHz),  $\delta$ : 173.373, 63.595, 61.997, 34.121, 31.870, 29.420, 24.913, 22.677, 14.110; FTIR ( $\nu/\text{cm}^{-1}$ ): 2959, 2916, 2844, 1738, 1695, 1455, 1394, 1175, 1099, 722.

**$\text{C}_{12}\text{BrEE}$ :** yellow liquid. Yield: 92%.  $^1\text{H}$  NMR ( $\text{CDCl}_3$ , 400 MHz),  $\delta$ : 4.400~4.369 (t, 2H), 3.525~3.494 (t, 2H), 2.365~2.328 (t, 2H), 1.656~1.621 (m, 2H), 1.262 (m, 18H), 0.898~0.864 (t, 3H);  $^{13}\text{C}$  NMR ( $\text{CDCl}_3$ , 100 MHz),  $\delta$ : 179.601, 173.413, 63.608, 34.123, 31.921, 29.606, 24.916, 22.696, 14.116; FTIR ( $\nu/\text{cm}^{-1}$ ): 2920, 2852, 1738, 1710, 1462, 1376, 1153, 1107, 712.

**$\text{C}_{14}\text{BrEE}$ :** white powder. Yield: 95%.  $^1\text{H}$  NMR ( $\text{CDCl}_3$ , 400 MHz),  $\delta$ : 4.402~4.371 (t, 2H), 3.526~3.496 (t, 2H), 2.367~2.329 (t, 2H), 1.658~1.605 (m, 2H), 1.262 (m, 22H), 0.901~0.866 (t, 3H);  $^{13}\text{C}$  NMR ( $\text{CDCl}_3$ , 100 MHz),  $\delta$ : 179.662, 173.412, 63.609, 34.134, 31.939, 29.658, 24.918, 22.706, 14.124; FTIR ( $\nu/\text{cm}^{-1}$ ): 2956, 2912, 2848, 1735, 1692, 1466, 1383, 1171, 1092, 719.

**$[\text{C}_{10}\text{Empy}][\text{Br}]$ :** pink powder. Yield: 95%.  $^1\text{H}$  NMR ( $\text{CDCl}_3$ , 400 MHz),  $\delta$ : 9.509 (s, H), 9.347 (d, 1H), 8.331 (d, 1H), 8.038 (t, 1H), 5.371 (s, 2H), 4.639 (s, 2H), 2.642 (s, 3H), 2.278~2.241 (m, 2H),

1.6485 (m, 2H), 1.213 (m, 14H), 0.863 (t, 3H);  $^{13}\text{C}$  NMR ( $\text{CDCl}_3$ , 100 MHz),  $\delta$ : 172.910, 146.323, 145.195, 142.907, 139.510, 127.573, 63.234, 60.205, 33.888, 31.826, 29.383, 29.226, 29.632, 29.035, 24.703, 22.637, 18.731, 14.096; FTIR ( $\text{v}/\text{cm}^{-1}$ ): 3017, 2992, 2923, 2841, 1735, 1634, 1502, 1462, 1390, 1146, 1085, 719.

**[C<sub>12</sub>Empy][Br]**: white powder. Yield: 95%.  $^1\text{H}$  NMR ( $\text{CDCl}_3$ , 400 MHz),  $\delta$ : 9.498 (s, H), 9.326 (d, 1H), 8.305 (d, 1H), 8.018 (t, 1H), 5.339~5.319 (t, 2H), 4.614~4.590 (t, 2H), 2.619 (s, 3H), 2.248~2.210 (t, 2H), 1.468~1.435 (t, 2H), 1.179 (m, 18H), 0.839~0.807 (t, 3H);  $^{13}\text{C}$  NMR ( $\text{CDCl}_3$ , 100 MHz),  $\delta$ : 172.894, 146.347, 146.299, 145.189, 142.917, 138.481, 127.568, 62.698, 60.169, 33.871, 31.860, 29.563, 29.422, 29.288, 29.227, 29.028, 24.686, 22.640, 18.704, 14.086; FTIR ( $\text{v}/\text{cm}^{-1}$ ): 3017, 2992, 2920, 2844, 1728, 1638, 1509, 1466, 1387, 1146, 1082, 726.

**[C<sub>14</sub>Empy][Br]**: white powder. Yield: 95%.  $^1\text{H}$  NMR ( $\text{CDCl}_3$ , 400 MHz),  $\delta$ : 9.476 (s, H), 9.317 (d, 1H), 8.300 (d, 1H), 8.017 (t, 1H), 5.343~5.322 (t, 2H), 4.618~4.594 (t, 2H), 2.615 (s, 3H), 2.255~2.210 (t, 2H), 1.478~1.445 (t, 2H), 1.212 (m, 22H), 0.851~0.817 (t, 3H);  $^{13}\text{C}$  NMR ( $\text{CDCl}_3$ , 100 MHz),  $\delta$ : 172.913, 146.263, 145.266, 145.202, 142.938, 139.473, 127.553, 62.698, 60.221, 33.879, 31.890, 29.655, 29.622, 29.586, 29.447, 29.247, 29.134, 29.046, 24.698, 22.659, 18.708, 14.066; FTIR ( $\text{v}/\text{cm}^{-1}$ ): 3013, 2992, 2912, 2844, 1735, 1634, 1509, 1469, 1387, 1146, 1017, 719.

The purity of the synthesized ionic liquids was estimated by  $^1\text{H}$  NMR, and the purity of [C<sub>n</sub>Empy][Br] ( $n=10, 12, 14$ ) were 98.6%, 99.3% and 99.4%, respectively.

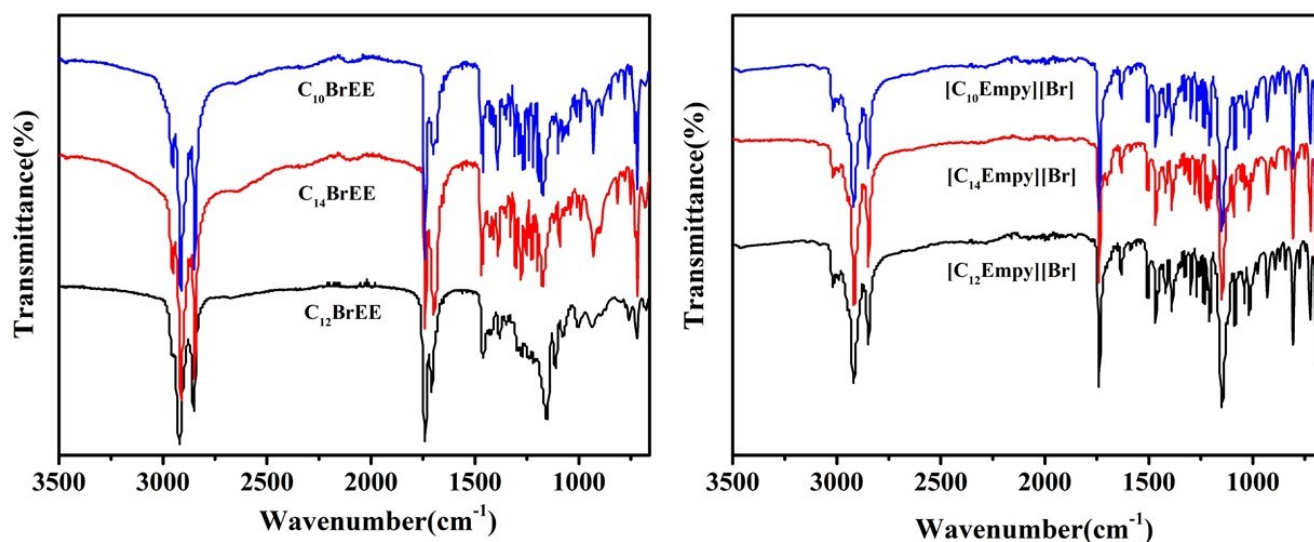

**Fig. S1.** FTIR spectrum of synthesized C<sub>n</sub>BrEE and [C<sub>n</sub>Empy][Br]

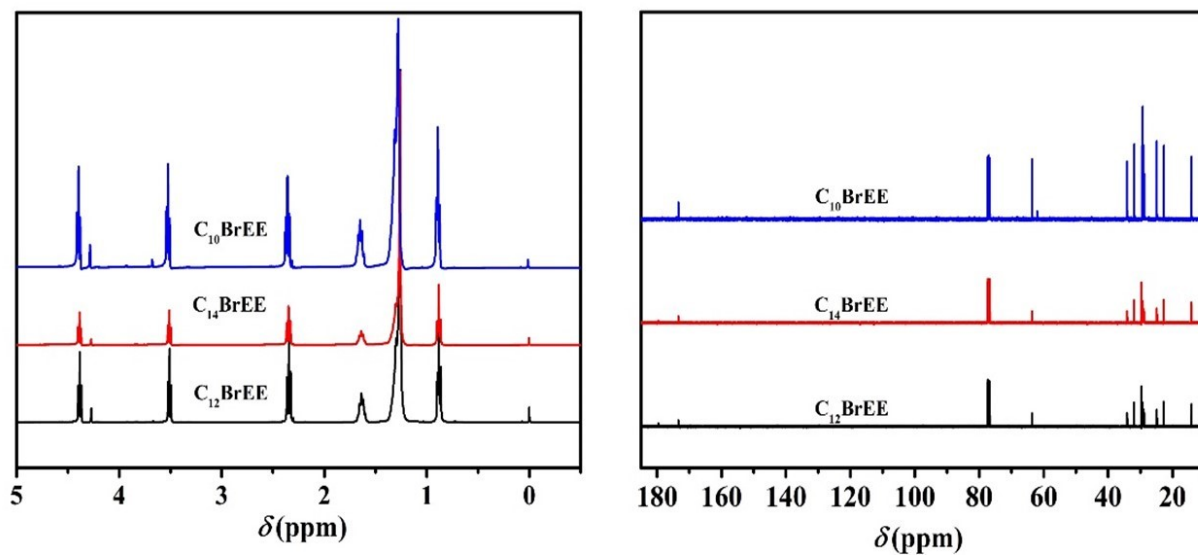

Fig. S2. ( $^1\text{H}$ ,  $^{13}\text{C}$ ) NMR spectrum of synthesized  $\text{C}_n\text{BrEE}$

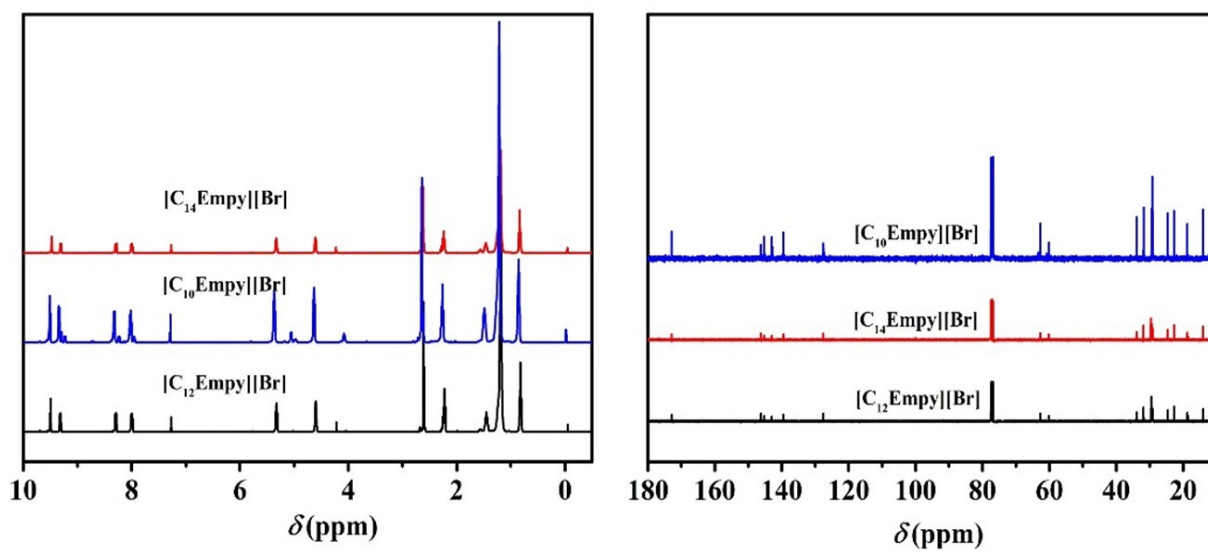

Fig. S3. ( $^1\text{H}$ ,  $^{13}\text{C}$ ) NMR spectrum of synthesized  $[\text{C}_n\text{Empy}][\text{Br}]$

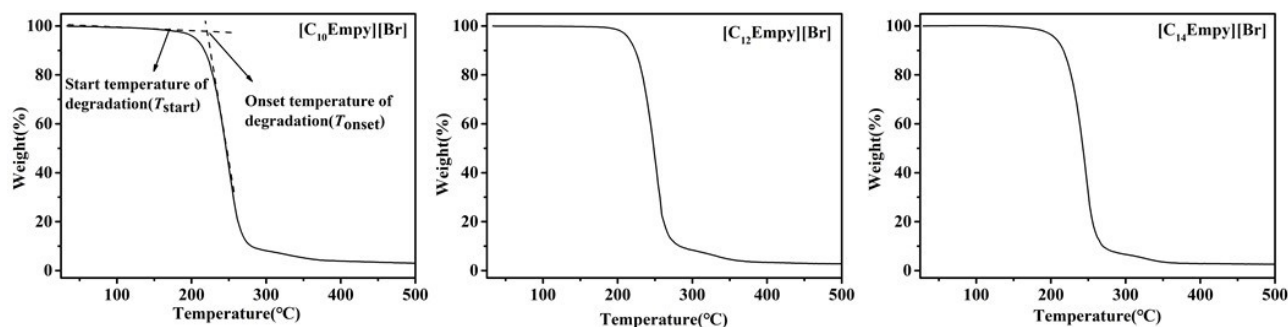

**Fig. S4.** TGA curve of synthesized  $[C_n\text{Empy}][\text{Br}]$

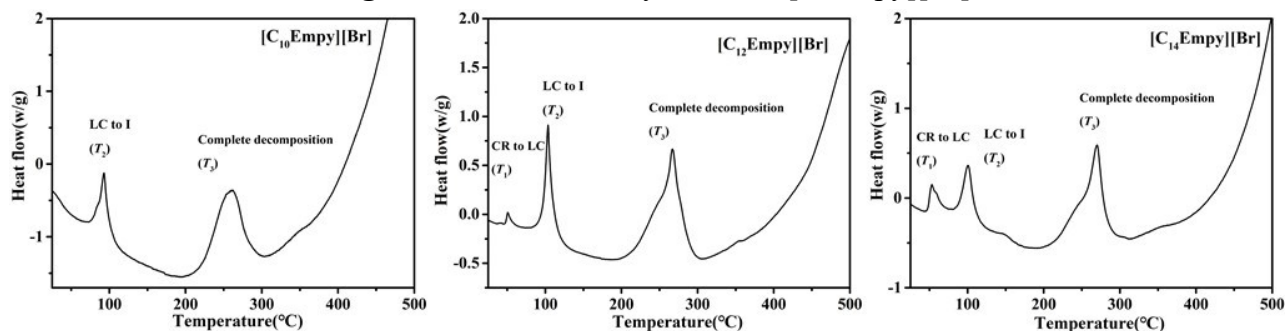

**Fig. S5.** DSC curve of synthesized  $[C_n\text{Empy}][\text{Br}]$ . The temperature at which the ionic liquids transform from CR phase to LC phase is the melting point of the ionic liquids (ie  $T_1$ ), and the temperature at which the ionic liquids transform from LC phase to I phase is the thermal transition temperatures of the ionic liquids (ie  $T_2$ ).

**Table S1** Coefficients of polynomials  $\text{CMC}=A+BT+CT^2$ ; the temperature  $T^*(\text{CMC})$ , at the minimum critical micelle concentration,  $\text{CMC}^*$

| ILs                                     | A         | B       | C                       | $\text{CMC}^*$ | $T^*$  |
|-----------------------------------------|-----------|---------|-------------------------|----------------|--------|
| $[\text{C}_{10}\text{Empy}][\text{Br}]$ | 418.03088 | -2.694  | 0.00458                 | 21.84          | 294.11 |
| $[\text{C}_{12}\text{Empy}][\text{Br}]$ | 141.446   | -0.9305 | 0.0016                  | 6.16           | 290.80 |
| $[\text{C}_{14}\text{Empy}][\text{Br}]$ | 72.6781   | -0.4890 | $8.4697 \times 10^{-4}$ | 2.10           | 288.68 |

Units:  $T(\text{K})$ ;  $B(\text{K}^{-1})$ ;  $C(\text{K}^{-2})$ ;  $T^*(\text{K})$ ;  $\text{CMC}^*(\text{mmol} \cdot \text{L}^{-1})$

**Table S2** Coefficients of polynomials  $\text{Log } X_{\text{CMC}}=A+BT+CT^2$ ;  $T_0$  at  $\Delta H_{\text{mic}}^\theta=0$ ; together with the “chemical part” of the micellization process,  $\Delta H_c^\theta$ , compensation temperature,  $T_c$  and standard heat capacity change upon micelle formation,  $\Delta C_{p,\text{mic}}^\theta$ , for the investigated systems.

| ILs                                     | A       | B        | C                       | $T_0$  | $\Delta C_{p,\text{mic}}^\theta$ | $\Delta H_c^\theta$ | $T_c$  |
|-----------------------------------------|---------|----------|-------------------------|--------|----------------------------------|---------------------|--------|
| $[\text{C}_{10}\text{Empy}][\text{Br}]$ | 5.64556 | -0.04967 | $8.4507 \times 10^{-5}$ | 292.84 | -466.44                          | -29.13              | 271.28 |
| $[\text{C}_{12}\text{Empy}][\text{Br}]$ | 6.96792 | -0.06314 | $1.0835 \times 10^{-4}$ | 290.67 | -638.47                          | -36.76              | 287.80 |
| $[\text{C}_{14}\text{Empy}][\text{Br}]$ | 10.2092 | -0.08915 | $1.5419 \times 10^{-4}$ | 288.59 | -926.00                          | -41.16              | 288.16 |

Units:  $T(\text{K})$ ;  $B(\text{K}^{-1})$ ;  $C(\text{K}^{-2})$ ;  $T_0, T_c(\text{K})$ ;  $\Delta H_c^\theta, \text{kJ mol}^{-1}$ ,  $\Delta C_{p,\text{mic}}^\theta (\text{J} \cdot \text{K}^{-1} \cdot \text{mol}^{-1})$ .
